# Supplementary material
Source: ML conference proceedings conference paper supplement (https://proceedings.mlr.press/v28/zhang13c.html)
Supplement: Supplementary file 1 [file zhang13c-supp.pdf]

---

# Supplementary Material: Online Kernel Learning with a Near Optimal Sparsity Bound

---

**Lijun Zhang**

ZHANGLIJ@MSU.EDU

**Jinfeng Yi**

YIJINFEN@MSU.EDU

**Rong Jin**

RONGJIN@CSE.MSU.EDU

Department of Computer Science and Engineering, Michigan State University, East Lansing, MI 48824, USA

**Ming Lin**

LIN-M08@MAILS.TSINGHUA.EDU.CN

Department of Automation, Tsinghua University, Beijing 100084, China

**Xiaofei He**

XIAOFEIHE@CAD.ZJU.EDU.CN

State Key Laboratory of CAD&CG, College of Computer Science, Zhejiang University, Hangzhou 310027, China

## A. Proof of Theorem 2

We here prove a lower bound on the number of support vectors to achieve the optimal regret bound.

First, we construct a set of  $n$  examples  $\mathcal{T}_1 = \{(\mathbf{x}_i, y_i)\}_{i=1}^n$ , where  $\langle \kappa(\mathbf{x}_i, \cdot), \kappa(\mathbf{x}_j, \cdot) \rangle_{\mathcal{H}_\kappa} = \delta_{ij}$  and  $y_i \in \{1, -1\}$ . To make the construction, consider the degree- $d$  polynomial kernel  $\kappa(\mathbf{x}, \mathbf{y}) = (\mathbf{x}^T \mathbf{y})^d$  and an Euclidean space  $\mathbb{R}^m$  where  $m > n$ . Since  $m > n$ , we can find a set of orthonormal vectors  $\{\mathbf{x}_1, \dots, \mathbf{x}_n\}$  in  $\mathbb{R}^m$  such that  $\mathbf{x}_i^T \mathbf{x}_j = 0$  when  $i \neq j$  and  $\mathbf{x}_i^T \mathbf{x}_i = 1$ . It is easy to verify that this construction satisfies our assumption  $\kappa(\mathbf{x}_i, \mathbf{x}_j) = \delta_{ij}$ . For the Gaussian kernel, when the distance between  $\mathbf{x}_i$  and  $\mathbf{x}_j$  are large enough, we also have  $\kappa(\mathbf{x}_i, \mathbf{x}_j) \approx \delta_{ij}$ .

Based on  $\mathcal{T}_1$ , we construct another set  $\mathcal{T}_2$ :  $(\mathbf{z}, u) \in \mathcal{T}_2$  if there exist an index  $j \in [n]$  and a function  $\xi \in \mathcal{H}_\kappa$  such that

$$\kappa(\mathbf{z}, \cdot) = \kappa(\mathbf{x}_j, \cdot) + \xi, \quad u = y_j, \quad \text{and} \quad \langle \xi, \kappa(\mathbf{x}_i, \cdot) \rangle_{\mathcal{H}_\kappa} = 0, \quad \forall i \in [n]. \quad (13)$$

Thus, for each  $(\mathbf{z}, u) \in \mathcal{T}_2$ , there is a corresponding  $(\mathbf{x}_j, y_j) \in \mathcal{T}_1$  such that the relationships in (13) hold. The existence of  $\mathcal{T}_2$  can be proved in a similar way as that of  $\mathcal{T}_1$ .

Second, we select  $T$  distinct training examples  $(\mathbf{z}_1, u_1), \dots, (\mathbf{z}_T, u_T)$  from  $\mathcal{T}_2$  such that, for each  $(\mathbf{x}, y) \in \mathcal{T}_1$  there are  $T/n$  examples constructed from it. Taking logit loss  $\ell(y, z) = \ln(1 + \exp(-yz))$  as an example. From the above constructions, it is easy to check that

$$f_* = \frac{R}{\sqrt{n}} \sum_{i=1}^n y_i \kappa(\mathbf{x}_i, \cdot)$$

minimizes the cumulative loss on the  $T$  training examples, i.e.,

$$f_* = \operatorname{argmin}_{\|f\|_{\mathcal{H}_\kappa} \leq R} \sum_{i=1}^T \ell(u_i, f(\mathbf{z}_i)) = \operatorname{argmin}_{\|f\|_{\mathcal{H}_\kappa} \leq R} \sum_{i=1}^T \ell(u_i, \langle f, \kappa(\mathbf{z}_i, \cdot) \rangle_{\mathcal{H}_\kappa}) = \operatorname{argmin}_{\|f\|_{\mathcal{H}_\kappa} \leq R} \sum_{j=1}^n \sum_{k=1}^{T/n} \ell(y_j, \langle f, \kappa(\mathbf{x}_j, \cdot) + \xi_{jk} \rangle_{\mathcal{H}_\kappa}),$$

and the minimal loss is given by

$$\epsilon = T \ln(1 + \exp(-R/\sqrt{n})).$$

Choosing

$$R = \sqrt{n} \ln \frac{T}{n},$$

we have

$$\epsilon \leq T \exp(-R/\sqrt{n}) = n.$$

Thus, the optimal solution  $f_*$  has  $n$  support vectors and the associated loss is  $O(n)$ .

Third, we examine the performance of Algorithm 1. From Theorem 1, we know that both the regret and the number of support vectors of OSKL is on the order of

$$O(\epsilon + R^2) = O(n[\ln T]^2).$$

Finally, we consider any algorithm that outputs a sequence of kernel classifiers  $f'_1, \dots, f'_T$  with no more than  $n - 1$  support vectors. By our construction, this algorithm must misclassify at least  $T/n$  training examples, and the cumulative loss  $\sum_{i=1}^T \ell(u_i, f'_i(\mathbf{z}_i))$  must be *larger than*

$$\frac{T}{n} \ln 2 = \Omega\left(\frac{T}{n}\right).$$

Recall that the cumulative loss of  $f_*$  is  $O(n)$ . So, the regret of this algorithm is also larger than  $\Omega(T/n)$ , which is significantly worse than  $O(n[\ln T]^2)$  for large  $T$ .

## B. Proof of Lemma 1

We first state the Bernstein's inequality for martingales (Cesa-Bianchi & Lugosi, 2006), which lays the foundation of the main results.

**Theorem 3.** (*Bernstein's inequality for martingales*). *Let  $X_1, \dots, X_n$  be a bounded martingale difference sequence with respect to the filtration  $\mathcal{F} = (\mathcal{F}_i)_{1 \leq i \leq n}$  and with  $|X_i| \leq K$ . Let*

$$S_i = \sum_{j=1}^i X_j$$

*be the associated martingale. Denote the sum of the conditional variances by*

$$\Sigma_n^2 = \sum_{t=1}^n \mathbb{E}[X_t^2 | \mathcal{F}_{t-1}].$$

*Then, for all constants  $t, \nu > 0$ ,*

$$\Pr \left[ \max_{i=1, \dots, n} S_i > t \text{ and } \Sigma_n^2 \leq \nu \right] \leq \exp \left( -\frac{t^2}{2(\nu + Kt/3)} \right),$$

*and therefore,*

$$\Pr \left[ \max_{i=1, \dots, n} S_i > \sqrt{2\nu t} + \frac{2}{3}Kt \text{ and } \Sigma_n^2 \leq \nu \right] \leq e^{-t}.$$

*Proof.* Define martingale difference

$$X_t = GZ_t - |\ell'(y_t, f_t(\mathbf{x}_t))|,$$

and martingale  $\Lambda_T = \sum_{t=1}^T X_t$ . Define

$$K = \max_t |X_t| \leq G.$$

Define the conditional variance  $\Sigma_T^2$  as

$$\Sigma_T^2 = \sum_{t=1}^T \mathbb{E}_{t-1} [(GZ_t - |\ell'(y_t, f_t(\mathbf{x}_t))|)^2] \leq \sum_{t=1}^T G |\ell'(y_t, f_t(\mathbf{x}_t))| = GA_T.$$

Since  $A_T \leq 1$ , we have  $\Sigma_T^2 \leq \frac{G}{T}$ . Following Theorem 3, with probability at least  $1 - \delta$ , we have

$$\Lambda_T = \sum_{t=1}^T GZ_t - |\ell'(y_t, f_t(\mathbf{x}_t))| \leq \sqrt{2\frac{G}{T} \ln \frac{1}{\delta}} + \frac{2}{3}G \ln \frac{1}{\delta} \leq G \ln \frac{1}{\delta},$$

where the last inequality follows from the fact  $T \geq 18/[G \ln(1/\delta)]$ .  $\square$

### C. Proof of Lemma 2

We use the same definitions of  $X_t$ ,  $\Lambda_T$ ,  $K$  and  $\Sigma_T^2$  in Appendix B. Notice that  $A_T$  in the upper bound for  $\Sigma_T^2$  is a random variable, thus we cannot direct apply Theorem 3. To handle this challenge, we make use of the peeling process described in (Bartlett et al., 2005), and have

$$\begin{aligned}
 & \Pr\left(\Lambda_T \geq 2\sqrt{GA_T\tau} + \frac{2}{3}K\tau\right) \\
 &= \Pr\left(\Lambda_T \geq 2\sqrt{GA_T\tau} + \frac{2}{3}K\tau, A_T \leq G_1T\right) \\
 &= \Pr\left(\Lambda_T \geq 2\sqrt{GA_T\tau} + \frac{2}{3}K\tau, \Sigma_T^2 \leq GA_T, A_T \leq G_1T\right) \\
 &\leq \Pr\left(\Lambda_T \geq 2\sqrt{GA_T\tau} + \frac{2}{3}K\tau, \Sigma_T^2 \leq GA_T, A_T \leq \frac{1}{T}\right) \\
 &\quad + \sum_{i=1}^m \Pr\left(\Lambda_T \geq 2\sqrt{GA_T\tau} + \frac{2}{3}K\tau, \Sigma_T^2 \leq GA_T, \frac{2^{i-1}}{T} < A_T \leq \frac{2^i}{T}\right) \\
 &\leq \Pr\left(A_T \leq \frac{1}{T}\right) + \sum_{i=1}^m \Pr\left(\Lambda_T \geq \sqrt{2\frac{G2^i}{T}\tau} + \frac{2}{3}K\tau, \Sigma_T^2 \leq \frac{G2^i}{T}\right) \\
 &\leq \Pr\left(A_T \leq \frac{1}{T}\right) + me^{-\tau},
 \end{aligned}$$

where  $m = \lceil \log_2(G_1T^2) \rceil$ , and the last step follows the Bernstein's inequality for martingales. We complete the proof by setting  $\tau = \ln(m/\delta)$ , and using the assumption  $A_T > 1/T$ .
